# Supplementary material
Source: publisher figshare collection journal article supplement (https://acs.figshare.com/ndownloader/files/5841192)
Supplement: Supplementary file 1 [file 5841192]

## Supporting information: Direct Preparation of Monoarylidene Derivatives of Aldehydes and Enolizable Ketones with DIMCARB

Ulf P. Kreher\*, Anthony E. Rosamilia, Colin L. Raston, Janet L. Scott and Christopher R. Strauss\*.

### **Synthesis of *E*-2-benzylidenecyclohexanone (Table 1, entry 1, method a).**

Benzaldehyde (1.0 g, 9.4 mmol) was added to DIMCARB (10 mL) at ambient temperature with stirring. Gas was evolved. The solution was heated to 50 °C and cyclohexanone (0.94 g, 9.4 mmol) was added in a single portion. Stirring at 50 °C was continued for 8 h. DIMCARB (6.45 g, 61 %) was recovered from the reaction mixture by distillation at 60 °C under an atmosphere of CO<sub>2</sub>.

The undistilled residue was acidified with 0.5 M H<sub>2</sub>SO<sub>4</sub> (25 mL) and extracted with ether (3 × 25 mL). The combined ether fraction was dried with anhydrous MgSO<sub>4</sub>, filtered and the solvent removed *in vacuo* to afford a green oil (1.40 g). Si gel chromatography with hexane/ethyl acetate (1:1) yielded *E*-2-benzylidenecyclohexanone (1.00 g, 57 %), as a yellow solid m.p. 53-55 °C (lit.<sup>i</sup> 53-54 °C). <sup>1</sup>H n.m.r. (300 MHz, CDCl<sub>3</sub>): δ 1.69 – 1.61 (m, 2H, -CH<sub>2</sub>-), 1.85 – 1.77 (m, 2H, -CH<sub>2</sub>-), 2.44 (t, *J* = 6.7 Hz, 2H, -CH<sub>2</sub>-C=O), 2.73 (td, *J* = 6.4, 2.2 Hz, 2H, CH=CCH<sub>2</sub>), 7.36 - 7.19 (m, 5H, ArH), 7.43 (t, *J* = 2.2, 1H, Ar-CH=C). <sup>13</sup>C n.m.r. (75 MHz, CDCl<sub>3</sub>): δ 23.25 (-CH<sub>2</sub>-); 23.77 (-CH<sub>2</sub>-); 28.80 (CH=CCH<sub>2</sub>); 40.19 (CH<sub>2</sub>-C=O); 128.25 (*o*-Ar); 128.42 (*p*-Ar); 130.19 (*m*-Ar); 135.37 (Ar-CH); 135.54 (Ar-CH=C); 136.57 (CH=CC=O); 201.29 (C=O).

**Synthesis of 2-benzylidenecyclohexanone (Table 1, entry 1, method b).**

Benzaldehyde (1.0 g, 9.4 mmol) was added to DIMCARB (3 mL) at ambient temperature with stirring. Gas was evolved. Cyclohexanone (0.925 g, 9.4 mmol) was added in a single portion. Stirring at ambient temperature was continued for 31.5 h. DIMCARB was recovered from the crude reaction mixture by distillation at 40 °C under high vacuum.

The undistilled residue was acidified with 0.5 M H<sub>2</sub>SO<sub>4</sub> (25 mL) and extracted with ether (3 × 25 mL). The combined ether fraction was dried with anhydrous MgSO<sub>4</sub>, filtered and the solvent removed *in vacuo* to afford a green oil (1.40 g). Si chromatography with 1:1 hexane/ethyl acetate yielded *E*-2-benzylidenecyclohexanone (0.99 g, 73 %) as a yellow solid, *E,E*-2,6-bisbenzylidenecyclohexanone as a yellow solid (0.21 g, 8.1 %) and a mixture of diastereoisomers of 2-(hydroxyphenylmethyl)cyclohexanone (0.14 g, 7.3 %) as a yellow solid. Physical data is consistent with prior experiments for this compound.

**Synthesis of *E*-2-benzylidenecyclohexanone (Table 1, entry 1, method c).**

Benzaldehyde (0.5 g, 4.7 mmol) was added to DIMCARB (2.5 mL) at ambient temperature with stirring. Gas was evolved. The solution was heated to 50 °C and cyclohexanone (0.925 g, 9.4 mmol) was added in a single portion. Stirring at 50 °C was continued for 5.25 h during which the clear solution turned orange.

The reaction mixture was acidified with 0.5 M H<sub>2</sub>SO<sub>4</sub> (25 mL) and extracted with dichloromethane (3 × 25 mL). The combined organic fraction was dried with anhydrous MgSO<sub>4</sub>, filtered and the solvent removed *in vacuo* to provide a green oil (0.80 g). Si chromatography with 1:1 hexane/ethyl acetate mixture yielded *E*-2-

benzylidenecyclohexanone (0.67 g, 76 %) as a yellow solid. Physical data is consistent with prior experiments for this compound.

**Synthesis of *E*-2-benzylidenecyclopentanone (Table 1, entry 2, method a).**

Benzaldehyde (1.0 g, 9.4 mmol) was added to DIMCARB (10 mL) at ambient temperature with stirring. Gas was evolved. The solution was heated to 52 °C and cyclopentanone (0.79 g, 9.4 mmol) was added in a single portion. Stirring at 52 °C was continued for 3 h, after which the colorless reaction mixture had become dark brown. DIMCARB (8.71 g, 83 %) was recovered from the reaction mixture by distillation at 60 °C under high vacuum.

The undistilled residue was acidified with 0.5 M H<sub>2</sub>SO<sub>4</sub> (25 mL) and extracted with ethyl acetate (3 × 25 mL). The combined organic fraction was dried with anhydrous MgSO<sub>4</sub>, filtered and the solvent removed *in vacuo* to afford a brown oil (1.21 g). Si chromatography with ethyl acetate yielded *E*-2-benzylidenecyclopentanone (1.06 g, 74 %) as a yellow solid m.p. 54-57 °C. <sup>1</sup>H n.m.r. (300 MHz, CDCl<sub>3</sub>): δ 2.06 (app p, *J* = 7.6 Hz, 2H, -CH<sub>2</sub>-), 2.44 (t, *J* = 8.0 Hz, 2H, -CH<sub>2</sub>-C=O), 3.00 (td, *J* = 7.2, 2.7 Hz, 2H, C=CCH<sub>2</sub>), 7.48 – 7.30 (m, 4H, 3 × ArCH, 1 × Ar-CH=C), 7.59 – 7.56 (m, 2H, ArCH). <sup>13</sup>C n.m.r. (75 MHz, CDCl<sub>3</sub>): δ 20.20 (-CH<sub>2</sub>-); 29.36 (-CH<sub>2</sub>-C=C); 37.79 (-CH<sub>2</sub>-C=O); 128.73 (*p*-Ar); 128.36 (*p*-Ar); 130.55 (*m*-Ar); 132.42 (Ar-CH); 135.57 (Ar-CH=C); 136.12 (CH=C=O); 208.24 (C=O).

**Synthesis of *E*-2-benzylidenecyclopentanone (Table 1, entry 2, method b).**

Benzaldehyde (1.0 g, 9.4 mmol) was added to DIMCARB (3 mL) at ambient temperature with stirring. Gas was evolved. Cyclopentanone (0.79 g, 9.4 mmol) was added in a single portion. Stirring at ambient temperature was continued for 3 h, during which time the colorless reaction mixture became orange.

The reaction mixture was acidified with 0.5 M H<sub>2</sub>SO<sub>4</sub> (25 mL) and extracted with dichloromethane (3 × 25 mL). The combined organic fraction was dried with anhydrous MgSO<sub>4</sub>, filtered and the solvent removed *in vacuo* to afford a brown oil (1.35 g). Si chromatography with 1:1 hexane/ethyl acetate mixture yielded *E*-2-benzylidenecyclopentanone (1.03 g, 64 %) as a yellow solid. Physical data is consistent with prior experiments for this compound.

**Synthesis of *E*-phenylbut-1-en-3-one (Table 1, entry 3, method a).**

Benzaldehyde (1.0 g, 9.4 mmol) was added to DIMCARB (10 mL) at ambient temperature with stirring. Gas was evolved. The solution was heated to 54 °C and acetone (0.547 g, 9.4 mmol) was added in a single portion. Stirring at 54 °C was continued for 3 h during which the clear, colorless solution turned red. DIMCARB (5.84 g, 56 %) was recovered from the reaction mixture by distillation at 45 °C under an atmosphere of CO<sub>2</sub>.

The undistilled residue was acidified with 0.5 M H<sub>2</sub>SO<sub>4</sub> (25 mL) and extracted with ethyl acetate (2 × 25 mL). The combined organic fraction was dried with anhydrous MgSO<sub>4</sub>. An aliquot (60%) of the solution was worked up by filtration of MgSO<sub>4</sub> and solvent removal *in vacuo* to afford a red oil (0.66 g). Purification of this fraction was

performed by Si chromatography using a 1:1 hexane/ethyl acetate mixture to afford *E*-phenylbut-1-en-3-one (0.36g, 43 %) as an oil. Crystallisation yielded white crystals m.p. 37-39 °C(lit. 39-42 °C). <sup>1</sup>H n.m.r. (300 MHz, CDCl<sub>3</sub>): δ 2.35 (s, 3H, -CH<sub>3</sub>), 6.70 (d, *J* = 16.9 Hz, 1H, =CH-C=O), 7.39 - 7.35 (m, 3H, ArH), 7.54 - 7.47 (m, 3H, 2 × ArH, Ar-CH=).

**Synthesis of *E*-phenylbut-1-en-3-one (Table 1, entry 3, method b).**

Benzaldehyde (1.0 g, 9.4 mmol) was added to DIMCARB (3 mL) at ambient temperature with stirring. Gas was evolved. Acetone (0.547 g, 9.4 mmol) was added in a single portion. Stirring at ambient temperature was continued for 3 h during which the colorless solution became orange.

The reaction mixture was acidified with 0.5 M H<sub>2</sub>SO<sub>4</sub> (25 mL) and extracted with dichloromethane (3 × 25 mL). The combined organic fraction was dried with anhydrous MgSO<sub>4</sub>, filtered and the solvent removed *in vacuo* to afford a brown oil (1.23 g). <sup>1</sup>H n.m.r. spectra showed a 5 : 1 ratio of mono to bis adducts. Although these compounds were not separated, the <sup>1</sup>H n.m.r. spectrum indicated a 75 % yield of the mono adduct.

**Synthesis of a mixture of *E*-phenylpent-1-en-3-one and *E*-2-methyl-1-phenylbut-1-en-3-one (Table 1, entry 4).**

Benzaldehyde (1.0 g, 9.4 mmol) was added to DIMCARB (10 mL) at ambient temperature with stirring. Gas was evolved. The solution was heated to 50 °C and butanone (0.546 g, 9.4 mmol) was added in a single portion. Stirring at ambient

temperature was continued for 24h. DIMCARB was removed from the reaction mixture by distillation.

The undistilled residue was acidified with 0.5 M H<sub>2</sub>SO<sub>4</sub> (25 mL) and extracted with ethyl acetate (3 × 25 mL). The combined organic fraction was dried with anhydrous MgSO<sub>4</sub>, filtered and the solvent removed *in vacuo* to afford an orange oil. The oil was washed with hexane (5 mL) and the resulting precipitate was filtered. The solvent of the filtrate was removed *in vacuo* to yield a mixture of the benzylidenebutane isomers (1.04 g). The GC showed a ratio of 3.3 : 1 of the methyl substituted isomer (54 % yield) and the methylene substituted isomer (16 % yield), respectively. <sup>1</sup>H n.m.r. (300 MHz, CDCl<sub>3</sub>): δ 1.17 (t, *J* = 7.3 Hz, 3H, -CH<sub>3</sub> {1}); 2.06 (s, 3H, =C-CH<sub>3</sub> {2}); 2.45 (s, 3H, O=C-CH<sub>3</sub> {2}); 2.69 (q, *J* = 7.3 Hz, 2H, -CH<sub>2</sub>- {1}); 6.76 (d, *J* = 16.2 Hz, 1H, C=CH-C=O {1}); 7.45 – 7.34 (m, 4H, 3 × ArCH, 1 × Ar-CH=C {1,2}); 7.59 – 7.52 (m, 2H, 2 × ArCH, {1,2}). Individual isomers not separated.

#### **Synthesis of chalcone (Table 1, entry 5).**

Acetophenone (1.0 g, 8.3 mmol) was added to DIMCARB (5 mL) at ambient temperature with stirring. The solution was heated to 50 °C and benzaldehyde (0.88 g, 8.3 mmol) was added in a single portion. Gas was evolved. Stirring at 50 °C was continued for 48 h. DIMCARB was removed from the reaction mixture by distillation.

The undistilled reaction mixture was acidified with 0.5 M H<sub>2</sub>SO<sub>4</sub> (25 mL) and extracted with dichloromethane (3 × 25 mL). The combined organic fraction was dried with anhydrous MgSO<sub>4</sub>, filtered and the solvent removed *in vacuo* to provide a yellow oil (1.75 g). The <sup>1</sup>H n.m.r. spectrum showed 66 % conversion of the aldehyde and a 65 %

yield of chalcone.  $^{13}\text{C}$  n.m.r.(75 MHz,  $\text{CDCl}_3$ ):  $\delta$  122.26, 125.42, 128.58, 128.63, 128.68, 128.75, 129.09, 130.67 ( $\text{Ar}\underline{\text{C}}\text{H}$ ), 132.90 ( $\text{O}=\text{C}\underline{\text{C}}\text{H}$ ); 144.96 ( $\text{ArCH}=\text{C}$ ); 135.03, 138.35 ( $\text{ArC}$ ); 190.66 ( $\text{C}=\text{O}$ ).

**Synthesis of *E*-2-methyl-3-phenylpropenal (Table 1, entry 6).**

Benzaldehyde (1.0 g, 9.4 mmol) was added to DIMCARB (3 mL) at ambient temperature with stirring. Gas was evolved. Propionaldehyde (0.547 g, 9.4 mmol) was added in a single portion. Stirring at ambient temperature was continued for 48 h, during which the colorless mixture became a dark maroon. DIMCARB was removed from the reaction mixture by distillation leaving a yellow solid.

The residue was acidified with 0.5 M  $\text{H}_2\text{SO}_4$  (25 mL) and extracted with dichloromethane ( $3 \times 25$  mL). The combined organic fraction was dried with anhydrous  $\text{MgSO}_4$ , filtered and the solvent removed *in vacuo* to afford a red oil (1.20 g). Si chromatography with 95:5 hexane/ether yielded (0.84 g, 61 %) as a clear liquid.  $^1\text{H}$  n.m.r. (300 MHz,  $\text{CDCl}_3$ ):  $\delta$  2.07 (d,  $J = 1.3$ , 3H,  $-\text{CH}_3$ ); 7.25 (app s,  $\text{ArCH}=\text{C}$ ); 7.53 – 7.36 (m, 5H,  $\text{ArH}$ ); 9.58 (s, 1H,  $\text{O}=\text{CH}$ ).  $^{13}\text{C}$  n.m.r.(75 MHz,  $\text{CDCl}_3$ ):  $\delta$  11.06 ( $-\underline{\text{C}}\text{H}_3$ ); 128.85 (*o*- $\text{Ar}\underline{\text{C}}\text{H}$ ); 129.69 (*p*- $\text{Ar}\underline{\text{C}}\text{H}$ ); 130.16 (*m*- $\text{Ar}\underline{\text{C}}\text{H}$ ); 135.32 ( $\text{Ar}\underline{\text{C}}-\text{CH}=\text{C}$ ); 138.54 ( $\text{Ar}-\text{CH}=\underline{\text{C}}$ ); 149.85 ( $\text{ArC}-\underline{\text{C}}\text{H}=\text{C}$ ); 195.58 ( $\text{C}=\text{O}$ ).

**Synthesis of *E*-2-(4-methoxybenzylidene)cyclohexanone (Table 1, entry 7).**

*p*-Anisaldehyde (1.0 g, 7.4 mmol) was added to DIMCARB (10 mL) at ambient temperature with stirring. Gas was evolved. The solution was heated to 50 °C and cyclohexanone (0.73 g, 7.4 mmol) was added in a single portion. Stirring at 50 °C was continued for 24 h. DIMCARB was removed by distillation.

The undistilled residue was acidified with 0.5 M H<sub>2</sub>SO<sub>4</sub> (25 mL) and extracted with dichloromethane (3 × 25 mL). The combined organic fraction was dried with anhydrous MgSO<sub>4</sub>, filtered and the solvent removed *in vacuo* to afford a brown oil (1.51 g) shown by spectral analysis to contain mono and bis products.

*E*-2-(4-Methoxybenzylidene)cyclohexanone (1.17 g, 73 %) m.p. 64-66 °C; <sup>1</sup>H n.m.r. (300 MHz, CDCl<sub>3</sub>): δ 1.73 – 1.65 (m, 2H, -CH<sub>2</sub>-); 1.87 – 1.79 (m, 2H, -CH<sub>2</sub>-); 2.44 (t, *J* = 6.7 Hz, 2H, -CH<sub>2</sub>-C=O); 2.76 (td, *J* = 6.4, 2.2 Hz, 2H, C=CCH<sub>2</sub>); 3.75 (s, 3H, -OCH<sub>3</sub>); 6.83 (d, *J* = 8.8 Hz, 2H, *o*-ArH); 7.31 (d, *J* = 8.8 Hz, 2H, *m*-ArH); 7.41 (t, *J* = 2.1 Hz, 1H, Ar-CH=C); and *E,E*-2,6-bis(4-methoxybenzylidene)cyclohexanone (0.29 g, 12 %) <sup>13</sup>C n.m.r. (75 MHz, CDCl<sub>3</sub>): δ 23.20 (-CH<sub>2</sub>-); 28.68 (-C=CCH<sub>2</sub>); 55.46 (-OCH<sub>3</sub>); 114.09 (*o*-ArCH); 128.9 (ArC); 132.40 (*m*-ArCH); 134.51 (ArCH=C); 136.64 (ArCH=C); 160.11 (ArC-OCH<sub>3</sub>) were recrystallized from hexane.

**Synthesis of *E*-2-(4-methoxybenzylidene)cyclopentanone (Table 1, entry 8, method a).**

*p*-Anisaldehyde (1.0 g, 7.4 mmol) was added to DIMCARB (3 mL) at ambient temperature with stirring. Gas was evolved. Cyclopentanone (0.62 g, 7.4 mmol) was added in a single portion. Stirring at ambient temperature was continued for 3 h, during which the colorless reaction mixture became orange.



The reaction mixture was acidified with 0.5 M H<sub>2</sub>SO<sub>4</sub> (25 mL) and extracted with dichloromethane (3 × 25 mL). The combined organic fraction was dried with anhydrous MgSO<sub>4</sub>, filtered and the solvent removed *in vacuo* to afford 2-(4-methoxybenzylidene)cyclopentanone (1.16 g, 78 %) as an orange solid m.p. 64-66 °C (lit.<sup>ii</sup> 66-68 °C). <sup>1</sup>H n.m.r. (300 MHz, CDCl<sub>3</sub>): δ 1.90 (app p, *J* = 7.6, 2H, -CH<sub>2</sub>-); 2.27 (t, *J* = 7.9 Hz, 2H, -CH<sub>2</sub>-C=O); 2.82 (td, *J* = 7.2 Hz, 2H, C=CCH<sub>2</sub>); 3.72 (s, 3H, -OCH<sub>3</sub>); 6.83 (d, *J* = 8.8 Hz, 2H, *o*-ArH); 7.24 (t, *J* = 2.7 Hz, 1H, ArCH=C); 7.38 (d, *J* = 8.8 Hz, 2H, *m*-ArH). <sup>13</sup>C n.m.r. (75 MHz, CDCl<sub>3</sub>): δ 20.11 (-CH<sub>2</sub>-); 29.24 (-CH<sub>2</sub>-C=C); 37.71 (-CH<sub>2</sub>-C=O); 55.33 (-OCH<sub>3</sub>); 114.25 (*o*-Ar); 128.23 (Ar-CH); 132.11 (Ar-CH=C); 132.29 (*m*-Ar); 133.71 (CH=CC=O); 160.57 (ArCOCH<sub>3</sub>); 207.95 (C=O).

**Synthesis of *E*-2-(4-methoxybenzylidene)cyclopentanone (Table 1, entry 8, method b).**

*p*-Anisaldehyde (0.5 g, 3.7 mmol) was added to DIMCARB (1.5 mL) at ambient temperature with stirring. Gas was evolved. Cyclopentanone (0.62 g, 3.7 mmol) was added in a single portion. Stirring at ambient temperature was continued for 2 h.

The reaction was quenched by passing through silica gel with 1:1 ethyl acetate/hexane. The eluent was collected and removal *in vacuo* afforded *E*-2-(4-methoxybenzylidene)cyclopentanone (1.15 g, 77 %) as an orange oil, which solidified on standing. Physical data is consistent with prior experiments for this compound.

**Synthesis of *E*-2-(4-chlorobenzylidene)cyclohexanone (Table 1, entry 9).**

4-Chlorobenzaldehyde (1.0 g, 7.1 mmol) was added to DIMCARB (10 mL) at ambient temperature with stirring. Gas was evolved. The solution was heated to 50 °C and cyclohexanone (0.684 g, 7.1 mmol) was added in a single portion. Stirring at 50 °C continued for 28 h.

The crude mixture was distilled under high vacuum where the temperature was decreased to 40 °C. DIMCARB (4.98 g, 47 %) was recovered from the reaction mixture by distillation at 60 °C under an atmosphere of CO<sub>2</sub>.

The undistilled residue was acidified with 0.5 M H<sub>2</sub>SO<sub>4</sub> (25 mL) and extracted with ethyl acetate (3 × 25 mL). The combined organic fractions was dried with anhydrous MgSO<sub>4</sub>, filtered and the solvent removed *in vacuo* to afford a yellow oil (1.47 g). Si chromatography with 1:1 hexane/ethyl acetate mixture yielded *E*-2-(4-chlorobenzylidene)cyclohexanone (0.72 g, 48 %) as a beige solid m.p. 44-46 °C. <sup>1</sup>H n.m.r. (300 MHz, CDCl<sub>3</sub>): δ 1.69 – 1.61 (m, 2H, -CH<sub>2</sub>-); 1.85 – 1.77 (m, 2H, -CH<sub>2</sub>-); 2.42 (t, *J* = 6.8 Hz, 2H, -CH<sub>2</sub>-C=O); 2.68 (td, *J* = 6.4, 2.3 Hz, 2H, C=CCH<sub>2</sub>); 7.25 – 7.19 (m, 4H, ArH); 7.32 (t, *J* = 2.2 Hz, 1H, Ar-CH=C). <sup>13</sup>C n.m.r. (75 MHz, CDCl<sub>3</sub>): δ 23.23 (-CH<sub>2</sub>-); 23.74 (-CH<sub>2</sub>-); 28.85 (-CH<sub>2</sub>-C=C); 40.20 (-CH<sub>2</sub>-C=O); 128.53 (*o*-Ar); 131.47 (*m*-Ar); 134.02 (Ar-CH); 134.34 (Ar-CH=C); 137.07 (CH=CC=O); 201.08 (C=O).

**Synthesis of *E*-2-(1-naphthylidene)cyclohexanone (Table 1, entry 10).**

1-Naphthaldehyde (1.0 g, 6.4 mmol) was added to DIMCARB (3 mL) at ambient temperature with stirring. Gas was evolved. The solution was heated to 50 °C and cyclohexanone (0.627 g, 6.4 mmol) was added in a single portion. Stirring was continued for 18 h.

The reaction mixture was acidified with 0.5 M H<sub>2</sub>SO<sub>4</sub> (25 mL) and extracted with ethyl acetate (3 × 25 mL). The combined organic fraction was dried with anhydrous MgSO<sub>4</sub>, filtered and the solvent removed *in vacuo* to afford a yellow solid. Si chromatography with 1:1 hexane/ethyl acetate yielded *E*-2-(1-naphthylidene)cyclohexanone (1.21 g, 80 %) as a beige solid m.p. 54-56 °C. <sup>1</sup>H n.m.r. (300 MHz, CDCl<sub>3</sub>): δ 1.76 – 1.68 (m, 2H, -CH<sub>2</sub>-); 2.06 – 1.92 (m, 2H, -CH<sub>2</sub>-); 2.62 (t, *J* = 6.7 Hz, 2H, -CH<sub>2</sub>-C=O); 2.69 (td, *J* = 6.4, 2.0 Hz, 2H, C=CCH<sub>2</sub>); 7.38 (d, *J* = 7.1 Hz, 1H, ArH); 7.55 – 7.46 (m, 3H, ArH); 7.90 – 7.83 (m, 2H, ArH); 8.00 – 7.94 (m, 2H, ArH); 8.02 (app s, 1H, Ar-CH=C). <sup>13</sup>C n.m.r. (75 MHz, CDCl<sub>3</sub>): δ 23.92 (-CH<sub>2</sub>-); 24.25 (-CH<sub>2</sub>-); 29.27 (-CH<sub>2</sub>-C=C); 40.80 (-CH<sub>2</sub>-C=O); 124.86, 125.13, 126.26, 126.53, 127.02, 128.71, 128.93 (ArCH); 132.14, 132.27, 133.67, 139.16 (ArC); 133.27 (ArCH=C); 201.96 (C=O).

**Synthesis of *E*-2-benzylidenecyclopentanone (Table 2, entry 1).**

DIMCARB (3.275 mL, 27.5 mmol) was added to a solution of benzaldehyde (0.508 mL, 5.0 mmol) in CH<sub>2</sub>Cl<sub>2</sub> (5.5 mL) at ambient temperature. Gas was evolved. Cyclopentanone (0.445 mL, 5.0 mmol) was added in a single portion. Stirring at ambient temperature was continued for 18 h during which the colorless reaction mixture became orange.

The solvent mixture was removed *in vacuo* and the residue was acidified with 0.5 M H<sub>2</sub>SO<sub>4</sub> (10 mL) and extracted with ether (3 × 20 mL). The combined organic fraction was dried with anhydrous MgSO<sub>4</sub>, filtered and the solvent removed *in vacuo* to yield pure 2-benzylidenecyclopentanone (0.73 g, 85 %) as a brown solid. Physical data is consistent with prior experiments for this compound.

**Synthesis of 2-(4-methoxybenzylidene)cyclopentanone (Table 2, entry 2).**

DIMCARB (3.275 mL, 27.5 mmol) was added to a solution of *p*-anisaldehyde (0.608 mL, 5.0 mmol) in CH<sub>2</sub>Cl<sub>2</sub> (5.5 mL) at ambient temperature. Gas was evolved. Cyclopentanone (0.445 mL, 5.0 mmol) was added in a single portion. Stirring at ambient temperature was continued for 17 h during which the colorless reaction mixture became orange.

The solvent mixture was removed *in vacuo*, the residue was acidified with 0.5 M H<sub>2</sub>SO<sub>4</sub> (10 mL) and extracted with ethyl acetate (3 × 20 mL). The combined organic fraction was dried with anhydrous MgSO<sub>4</sub>, filtered and the solvent removed *in vacuo* to yield *E*-2-(4-methoxy benzylidene)cyclopentanone (0.92 g, 91 %) in high purity as an orange solid. Physical data is consistent with prior experiments for this compound.

**Synthesis of *E*-2-(2-methoxybenzylidene)cyclopentanone (Table 2, entry 3).**

DIMCARB (3.275 mL, 27.5 mmol) was added to a solution of *o*-anisaldehyde (0.681 g, 5.0 mmol) in CH<sub>2</sub>Cl<sub>2</sub> (5.5 mL) at ambient temperature. Gas was evolved. Cyclopentanone (0.445 mL, 5.0 mmol) was added in a single portion. Stirring at ambient temperature was continued for 17 h during which the colorless reaction mixture became orange.

The solvent was removed *in vacuo*, the residue was acidified with 0.5 M H<sub>2</sub>SO<sub>4</sub> (10 mL) and extracted with ethyl acetate (3 × 30 mL). The combined organic fraction was dried with anhydrous MgSO<sub>4</sub>, filtered and the solvent removed *in vacuo* to yield *E*-2-(2-methoxybenzylidene)cyclopentanone (0.88 g, 87 %) as a brown solid in high purity. <sup>1</sup>H n.m.r. (300 MHz, CDCl<sub>3</sub>): δ 1.99 (app p, *J* = 7.5 Hz, 2H, -CH<sub>2</sub>-); 2.39 (t, *J* = 7.9 Hz, 2H, -CH<sub>2</sub>-C=O); 2.91 (dt, *J* = 7.1, 2.7 Hz, 2H, C=CCH<sub>2</sub>); 3.86 (s, 3H, O-CH<sub>3</sub>); 6.91 (d, *J* = 8.3 Hz, 1H, ArH); 6.99 (dt, *J* = 8.1, 0.5 Hz, 1H, ArH); 7.33 (dt, *J* = 7.9, 1.7 Hz, 1H, ArH); 7.46 (dd, *J* = 7.7, 1.3 Hz, 1H, ArH); 7.80 (t, *J* = 2.7 Hz, 1H, Ar-CH=C). <sup>13</sup>C n.m.r. (75 MHz, CDCl<sub>3</sub>): δ 20.60 (-CH<sub>2</sub>-); 29.69 (-CH<sub>2</sub>-C=C); 38.13 (-CH<sub>2</sub>-C=O); 55.71 (O-CH<sub>3</sub>); 111.00, 120.44, 127.18, 129.88, 130.94 (ArCH, Ar-CH=C); 124.89, 136.27 (Ar-CH=C, CH=CC=O); 159.14 (ArC-OCH<sub>3</sub>); 208.08 (C=O).

**Synthesis of *E*-2-(4-hydroxybenzylidene)cyclopentanone (Table 2, entry 4).**

DIMCARB (3.275 mL, 27.5 mmol) was added to a suspension of 4-hydroxybenzaldehyde (0.611 g, 5.0 mmol) in CH<sub>2</sub>Cl<sub>2</sub> (5.5 mL) at ambient temperature. Gas was evolved and the solid dissolved. Cyclopentanone (0.445 mL, 5.0 mmol) was added in a single portion. Stirring at ambient temperature was continued for 18 h during which the colorless reaction mixture became deep red.

The solvent mixture was removed *in vacuo*, the residue was acidified with 0.5 M H<sub>2</sub>SO<sub>4</sub> (10 mL) and extracted with CH<sub>2</sub>Cl<sub>2</sub> (2 × 80 mL). The combined organic fraction was dried with anhydrous MgSO<sub>4</sub>, filtered and the solvent removed *in vacuo* to yield *E*-2-(4-hydroxybenzylidene)cyclopentanone (0.81 g, 86 %), as yellow solid m.p. 188-192 °C. <sup>1</sup>H n.m.r. (200 MHz, CD<sub>3</sub>OD): δ 2.02 (app p, *J* = 7.5 Hz, 2H, -CH<sub>2</sub>-); 2.39 (t, *J* = 7.6 Hz,

2H,  $-\text{CH}_2-\text{C}=\text{O}$ ); 2.91 (dt,  $J = 7.2, 2.7$  Hz, 2H,  $\text{C}=\text{CCH}_2$ ); 6.85 (d,  $J = 8.8$  Hz, 2H, *o*-ArH); 7.28 (t,  $J = 2.7$  Hz, 1H,  $\text{Ar}-\text{CH}=\text{C}$ ); 7.45 (d,  $J = 8.8$  Hz, 2H, *m*-ArH).  $^{13}\text{C}$  n.m.r. (50 MHz,  $\text{CD}_3\text{OD}$ ):  $\delta$  21.21 ( $-\underline{\text{CH}}_2-$ ); 30.35 ( $-\underline{\text{CH}}_2-\text{C}=\text{C}$ ); 38.73 ( $-\underline{\text{CH}}_2-\text{C}=\text{O}$ ); 116.93 (*o*-Ar); 133.93 (*m*-Ar); 134.38 ( $\text{Ar}-\underline{\text{CH}}=\text{C}$ ); 128.20, 134.18 ( $\underline{\text{Ar}}-\text{CH}=\text{C}$ ,  $\text{CH}=\underline{\text{C}}=\text{O}$ ); 160.65 ( $\underline{\text{Ar}}-\text{OH}$ ); 210.88 ( $\text{C}=\text{O}$ ).

**Synthesis of *E*-2-(4-chlorobenzylidene)cyclopentanone (Table 2, entry 5).**

DIMCARB (3.275 mL, 27.5 mmol) was added to a solution of *p*-chlorobenzaldehyde (0.703 g, 5.0 mmol) in  $\text{CH}_2\text{Cl}_2$  (5.5 mL) at ambient temperature. Gas was evolved. Cyclopentanone (0.445 mL, 5.0 mmol) was added in a single portion. Stirring at ambient temperature was continued for 60 h during which the colorless reaction mixture became yellow-green.

The solvent was removed *in vacuo*, the residue was acidified with 0.5 M  $\text{H}_2\text{SO}_4$  (10 mL) and extracted with ethyl acetate ( $3 \times 20$  mL). The combined organic fraction was dried with anhydrous  $\text{MgSO}_4$ , filtered and the solvent removed *in vacuo* to provide a brown solid (0.94 g, 91 %) m.p. 57-59 °C.  $^1\text{H}$  n.m.r. (400 MHz,  $\text{CDCl}_3$ ):  $\delta$  2.04 (app p,  $J = 7.6$  Hz, 2H,  $-\text{CH}_2-$ ); 2.41 (t,  $J = 7.9$  Hz, 2H,  $-\text{CH}_2-\text{C}=\text{O}$ ); 2.93 (dt,  $J = 7.3, 2.6$  Hz, 2H,  $\text{C}=\text{CCH}_2$ ); 7.30 (t,  $J = 2.8$  Hz, 1H,  $\text{Ar}-\text{CH}=\text{C}$ ); 7.38 (d,  $J = 8.4$  Hz, 2H, *o*-ArH); 7.53 (d,  $J = 8.4$  Hz, 2H, *m*-ArH).  $^{13}\text{C}$  n.m.r. (100 MHz,  $\text{CDCl}_3$ ):  $\delta$  20.29 ( $-\underline{\text{CH}}_2-$ ); 29.46 ( $-\underline{\text{CH}}_2-\text{C}=\text{C}$ ); 37.88 ( $-\underline{\text{CH}}_2-\text{C}=\text{O}$ ); 123.76, 134.65, 136.88 ( $\text{Ar}\underline{\text{C}}$ ); 131.75 ( $\text{Ar}-\underline{\text{CH}}=\text{C}$ ); 131.98, 132.11 ( $\text{Ar}\underline{\text{CH}}$ ); 207.88 ( $\text{C}=\text{O}$ ).

**Synthesis of *E*-2-(4-bromobenzylidene)cyclopentanone (Table 2, entry 6).**

DIMCARB (3.275 mL, 27.5 mmol) was added to a solution of *p*-bromobenzaldehyde (0.925 g, 5.0 mmol) in CH<sub>2</sub>Cl<sub>2</sub> (5.5 mL) at ambient temperature. Gas was evolved. Cyclopentanone (0.445 mL, 5.0 mmol) was added in a single portion. Stirring at ambient temperature was continued for 60 h during which time the colorless reaction mixture became beige.

The solvent was removed *in vacuo*, the residue was acidified with 0.5 M H<sub>2</sub>SO<sub>4</sub> (10 mL) and extracted with ethyl acetate (3 × 20 mL). The combined organic fraction was dried with anhydrous MgSO<sub>4</sub>, filtered and the solvent removed *in vacuo* to afford *E*-2-(4-bromobenzylidene)cyclopentanone (1.26 g, 82 %) as a brown solid in high purity 89-91 °C. <sup>1</sup>H n.m.r. (400 MHz, CDCl<sub>3</sub>): δ 2.03 (app p, *J* = 7.6 Hz, 2H, -CH<sub>2</sub>-); 2.40 (t, *J* = 7.9 Hz, 2H, -CH<sub>2</sub>-C=O); 2.92 (dt, *J* = 7.2, 2.8 Hz, 2H, C=CCH<sub>2</sub>); 7.30 (t, *J* = 2.7 Hz, 1H, Ar-CH=C); 7.36 (d, *J* = 8.5 Hz, 2H, *o*-ArH); 7.44 (d, *J* = 8.5 Hz, 2H, *m*-ArH). <sup>13</sup>C n.m.r. (100 MHz, CDCl<sub>3</sub>): δ 20.15 (-CH<sub>2</sub>-); 29.30 (-CH<sub>2</sub>-C=C); 37.73 (-CH<sub>2</sub>-C=O); 129.00, 131.66 (ArCH); 130.91 (Ar-CH=C); 134.09, 135.26, 136.61 (ArC, Ar-CH=C); 207.84 (C=O).

**Synthesis of *E*-2-(1-naphthylidene)cyclopentanone (Table 2, entry 7).**

DIMCARB (3.275 mL, 27.5 mmol) was added to a solution of 1-naphthaldehyde (0.679 mL, 5.0 mmol) in CH<sub>2</sub>Cl<sub>2</sub> (5.5 mL) at ambient temperature. Gas was evolved. Cyclopentanone (0.485 mL, 5.5 mmol) was added in a single portion. Stirring at ambient temperature was continued for 24 h during which the colorless reaction mixture became yellow.

The solvent mixture was removed *in vacuo* and the residue was acidified with 0.5 M H<sub>2</sub>SO<sub>4</sub> (10 mL) and extracted with ethyl acetate (3 × 25 mL). The combined organic fraction was dried with anhydrous MgSO<sub>4</sub>, filtered and the solvent removed *in vacuo* to yield *E*-2-(1-naphthylidene)cyclopentanone (0.92 g, 83 %) as a brown oil. <sup>1</sup>H n.m.r. (200 MHz, CDCl<sub>3</sub>): δ 1.93 (app p, *J* = 7.3 Hz, 2H, -CH<sub>2</sub>-); 2.42 (t, *J* = 7.9 Hz, 2H, -CH<sub>2</sub>-C=O); 2.84 (dt, *J* = 7.1, 2.7 Hz, 2H, C=CCH<sub>2</sub>); 7.59-7.41 (m, 4H, ArCH=C, ArH); 7.85-7.80 (m, 2H, ArH); 8.14-8.09 (m, 2H, ArH).

**Synthesis of *E*-2-(4-carboxybenzylidene)cyclopentanone (Table 2, entry 8).**

DIMCARB (3.275 mL, 27.5 mmol) was added to a suspension of 4-carboxybenzaldehyde (0.751 g, 5.0 mmol) in CH<sub>2</sub>Cl<sub>2</sub> (5.5 mL) at ambient temperature. Gas was evolved and the solid dissolved. Cyclopentanone (0.445 mL, 5.0 mmol) was added in a single portion. Stirring at ambient temperature was continued for 13 h during which the colorless reaction mixture became a deep yellow.

The solvent was removed *in vacuo*, the residue was acidified with 0.5 M H<sub>2</sub>SO<sub>4</sub> (25 mL) and extracted with CH<sub>2</sub>Cl<sub>2</sub> (2 × 80 mL). The combined organic fraction was dried with anhydrous MgSO<sub>4</sub>, filtered and the solvent removed *in vacuo* to yield *E*-2-(4-carboxybenzylidene)cyclopentanone (0.93 g, 74 %) as an orange solid m.p. 208-209 °C. <sup>1</sup>H n.m.r. (400 MHz, CD<sub>3</sub>OD): δ 2.05 (app p, *J* = 7.6 Hz, 2H, -CH<sub>2</sub>-); 2.41 (t, *J* = 7.9 Hz, 2H, -CH<sub>2</sub>-C=O); 3.01 (dt, *J* = 7.2, 2.8 Hz, 2H, C=CCH<sub>2</sub>); 7.34 (t, *J* = 2.8 Hz, 1H, Ar-CH=C); 7.64 (d, *J* = 8.3 Hz, 2H, *o*-ArH); 8.06 (d, *J* = 8.3 Hz, 2H, *m*-ArH). <sup>13</sup>C n.m.r. (100 MHz, CD<sub>3</sub>OD): δ 21.23 (-CH<sub>2</sub>-); 30.48 (-CH<sub>2</sub>-C=C); 38.71(-CH<sub>2</sub>-C=O); 131.14 (*o*-



Ar); 131.53 (*m*-Ar); 131.89 (Ar-CH=C); 132.46, 140.01, 141.29 (Ar-CH=C, Ar-CO<sub>2</sub>H, CH=CC=O); 169.40 (Ar-CO<sub>2</sub>H); 210.22 (C=O).

---

<sup>i</sup> Billimoria, J. D. *J. Chem. Soc, Abs.* **1955**, 1126.

<sup>ii</sup> Chen, F.-E.; Liu, J.-D.; Fu, H.; Peng, Z.-Z.; Shao, L. -Y. *Synth. Commun.*, **2000**, *30*, 2295.
